# Supplementary material
Source: HighWire-hosted journal article supplement (https://www.rcpjournals.org/highwire/filestream/7997/field_highwire_adjunct_files/1/Frearson_S2.pdf)
Supplement: Frearson_S2.pdf [file Frearson_S2.pdf]

## **S2. Interview protocol**

### **Information to be gathered at outset:**

Grade of doctor

Years in hospital medicine

Years in palliative medicine

Prior teaching experience

### **Assessment of prior knowledge:**

Had you heard of near peer teaching before the study?

Have you been involved in this teaching technique before? (If so, details)

### **Opinion at outset:**

When you were consented and entered the study, did you anticipate that near peer teaching would improve teaching on the ward round?

Did you have reservations about near peer teaching?

### **Intervention:**

- How many ward rounds involving near-peer techniques did you participate in?
- Were you the senior or junior trainee on each teaching episode?
- How much time was spent on each teaching episode?
- How much time in total was spent on near peer teaching on each ward round?

### **Opinions of intervention:**

- What did you like about near peer teaching?
- What did you dislike about near peer teaching?
- Can you think of other advantages of near peer teaching?
- Can you think of other disadvantages of near peer teaching?
- Do you think that ward rounds employing near peer teaching gave a better educational experience compared with usual ward rounds?
- Do you think near peer teaching has improved your ability to teach?
- Are you likely to want to be involved in near peer teaching methods in the future?

Offer opportunity to share any further opinions or comments
